# Supplementary material for: Diversity analysis of thermophilic hydrogenogenic carboxydotrophs by carbon monoxide dehydrogenase amplicon sequencing using new primers
Source: PubMed Central journal article supplement (PMC7811984; doi:10.1007/s00792-020-01211-y), 2021-01-07
Supplement: 792_2020_1211_MOESM1_ESM.pdf [file 792_2020_1211_MOESM1_ESM.pdf]

## **Electronic Supplementary Material**

**Journal: Extremophiles**

**Title:**

**Diversity analysis of thermophilic hydrogenogenic carboxydrotrophs by carbon monoxide dehydrogenase amplicon sequencing using new primers**

Kimiho Omae, Tatsuki Oguro, Masao Inoue, Yuto Fukuyama, Takashi Yoshida and Yoshihiko Sako

**Correspondence:**

Takashi Yoshida, Laboratory of Marine Microbiology, Graduate School of Agriculture, Kyoto University, Kitashirakawa Oiwake-cho, Sakyo-ku, Kyoto 606-8503, Japan.

E-mail: [yoshiten@kais.kyoto-u.ac.jp](mailto:yoshiten@kais.kyoto-u.ac.jp)

**Table S1** Primer sequences and efficiency of amplification for qPCR

| Primer target                                                        | Fw primer sequence (5' -> 3') | Rv primer sequence (5' -> 3') | Amplification efficiency (%) | R <sup>2</sup> |
|----------------------------------------------------------------------|-------------------------------|-------------------------------|------------------------------|----------------|
| CHY_RS08505 ( <i>Carboxydotherrmus hydrogenoformans</i> Z-2901)      | GCTAATGACCCGTAAAACC           | GTTACAACCGCAAATAAGG           | 93.7                         | 0.999          |
| ULO1_RS08880 ( <i>Carboxydocella</i> sp. ULO1)                       | TAACAATCCTAAGGCGATCC          | TGCCTCCTGAGTCATTAAAC          | 96.4                         | 0.998          |
| KKC1_RS06675 ( <i>Calderihabitans maritimus</i> KKC1)                | TGTCGCATTTGTTGGAAGGG          | ATGGTATCGGCATCAGCACC          | 93.9                         | 0.999          |
| AOT13_RS13420 ( <i>Parageobacillus thermoglucosidasius</i> DSM 2542) | TCCGCGGAGTCTGTCTCTTTG         | CAACCAGTAGCCAGCAGCAG          | 97.7                         | 0.999          |

**Table S2** The results of PCR amplification of genetic regions between CODH-OTUs and associated ECH genes

| DNA template  | Fw primer      | Rv primer       | Amplification | DNA fragment name  | Product size |
|---------------|----------------|-----------------|---------------|--------------------|--------------|
| JI_enriched_1 | ECH4c_Fw       | CODH_F4c1_p2_Rv | Yes           | F4c1_JI_enriched_1 | ~3 kbp       |
| JI_enriched_1 | ECH4c_Fw       | CODH_F4c2_p1_Rv | Yes           | F4c2_JI_enriched_1 | ~2.5 kbp     |
| JI_enriched_2 | ECH4c_Fw       | CODH_F4c1_p2_Rv | Yes           | F4c1_JI_enriched_2 | ~3 kbp       |
| JI_enriched_1 | CODH_F4a_p1_Fw | ECH4a_Rv        | No            | -                  | ~9 kbp*      |

\* Expected product size is shown.

**Table S3** Specific primer sequences used to determine the genomic context of CODH-OTUs

| Name        | Sequence (5' -> 3')        |
|-------------|----------------------------|
| sp1_F4c1_Rv | CTCTCGTAATCTACCAGCATTATAGC |
| sp2_F4c1_Fw | GAAGCGCTTCATGTTATGATACCGG  |
| sp3_F4c1_Rv | GGTTCAGGGGTACCAAATAAGGC    |
| sp1_F4c2_Rv | GATCAACCAGCATTACAGCCTGC    |
| sp2_F4c2_Fw | CTGGGGAGGCAGTTGCCAAG       |

**Table S4** GTDB taxonomy of genomes harboring CODHech genes

| <b>Accession</b> | <b>NCBI taxonomy</b>                                                   | <b>GTDDB taxonomy</b>                                            |
|------------------|------------------------------------------------------------------------|------------------------------------------------------------------|
| GCF_003947435.1  | <i>Candidatus Methanodesulfokores washburnensis</i>                    | <i>Candidatus Methanodesulfokores washburnensis</i> <sup>a</sup> |
| GCF_000813245.1  | <i>Thermofilum carboxyditrophus</i> 1505                               | <i>Thermofilum carboxyditrophus</i>                              |
| GCF_000816105.1  | <i>Thermococcus guaymasensis</i> DSM 11113                             | <i>Thermococcus guaymasensis</i>                                 |
| GCF_000018365.1  | <i>Thermococcus onnurineus</i> NA1                                     | <i>Thermococcus onnurineus</i>                                   |
| GCF_000151205.2  | <i>Thermococcus</i> sp. AM4                                            | <i>Thermococcus</i> sp000151205                                  |
| GCF_000151105.2  | <i>Thermococcus barophilus</i> MP                                      | <i>Thermococcus_B barophilus</i>                                 |
| GCF_001433455.1  | <i>Thermococcus barophilus</i> CH5                                     | <i>Thermococcus_B barophilus</i>                                 |
| GCF_000517445.1  | <i>Thermococcus paralvinellae</i> ES1                                  | <i>Thermococcus_B paralvinellae</i>                              |
| GCF_000166075.1  | <i>Parageobacillus thermoglucosidasius</i> Y4.1MC1                     | <i>Parageobacillus thermoglucosidasius</i>                       |
| GCF_000178395.2  | <i>Parageobacillus thermoglucosidasius</i> C56-YS93                    | <i>Parageobacillus thermoglucosidasius</i>                       |
| GCF_000258725.1  | <i>Parageobacillus thermoglucosidasius</i> TNO-09.020                  | <i>Parageobacillus thermoglucosidasius</i>                       |
| GCF_000648295.1  | <i>Parageobacillus thermoglucosidasius</i> NBRC 107763                 | <i>Parageobacillus thermoglucosidasius</i>                       |
| GCF_000966225.1  | <i>Parageobacillus thermoglucosidasius</i> DSM 2542                    | <i>Parageobacillus thermoglucosidasius</i>                       |
| GCF_001295365.1  | <i>Parageobacillus thermoglucosidasius</i> DSM 2542                    | <i>Parageobacillus thermoglucosidasius</i>                       |
| GCF_001587555.1  | <i>Parageobacillus thermoglucosidasius</i> B4168                       | <i>Parageobacillus thermoglucosidasius</i>                       |
| GCF_001651535.1  | <i>Parageobacillus thermoglucosidasius</i> GT23                        | <i>Parageobacillus thermoglucosidasius</i>                       |
| GCF_001700985.1  | <i>Parageobacillus thermoglucosidasius</i> NCIMB 11955                 | <i>Parageobacillus thermoglucosidasius</i>                       |
| GCF_001902495.1  | <i>Parageobacillus thermoglucosidasius</i> TM242                       | <i>Parageobacillus thermoglucosidasius</i>                       |
| GCF_003865195.1  | <i>Parageobacillus thermoglucosidasius</i> TG4                         | <i>Parageobacillus thermoglucosidasius</i>                       |
| GCF_000156275.2  | <i>Caldanaerobacter subterraneus</i> subsp. <i>pacificus</i> DSM 12653 | <i>Caldanaerobacter subterraneus</i>                             |
| GCF_000007085.1  | <i>Caldanaerobacter subterraneus</i> subsp. <i>tengcongensis</i> MB4   | <i>Caldanaerobacter subterraneus</i>                             |
| GCF_000473865.1  | <i>Caldanaerobacter subterraneus</i> subsp. <i>yonseiensis</i> KB-1    | <i>Caldanaerobacter subterraneus</i>                             |
| GCF_000806225.2  | <i>Thermoanaerobacter</i> sp. YS13                                     | <i>Thermoanaerobacter uzonensis</i>                              |
| GCF_001936615.1  | <i>Desulfosporosinus</i> sp. OL                                        | <i>Desulfosporosinus</i> sp001936615                             |
| GCF_000012865.1  | <i>Carboxydotherrmus hydrogenoformans</i> Z-2901                       | <i>Carboxydotherrmus hydrogenoformans</i>                        |
| GCF_001950325.1  | <i>Carboxydotherrmus islandicus</i> SET                                | <i>Carboxydotherrmus islandicus</i>                              |

GCF\_000214435.1 *Desulfotomaculum nigrificans* CO-1-SRB  
 GCF\_002207765.1 *Calderihabitans maritimus* KKC1  
 GCF\_003116935.1 *Moorella* sp. Hama-1  
 GCF\_001373375.1 *Moorella glycerini* NMP  
 GCF\_002995805.1 *Moorella stamsii* DSM 26271  
 GCF\_001875325.1 *Moorella thermoacetica* DSM 21394  
 GCF\_900176005.1 *Thermanaeromonas toyohensis* ToBE  
 GCF\_000746025.1 Clostridiales bacterium DRI-13  
 GCF\_000092945.1 *Thermincola potens* JR  
 GCF\_001263415.1 *Thermincola ferriacetica* Z-0001  
 GCF\_002049255.1 *Carboxydocella* sp. ULO1  
 GCF\_002049395.1 *Carboxydocella* sp. JDF658  
 GCF\_003047205.1 *Carboxydocella thermautotrophica* 19  
 GCF\_003054495.1 *Carboxydocella thermautotrophica* 41  
 GCF\_900167165.1 *Carboxydocella sporoproducens* DSM 16521  
 GCF\_000169155.1 *Thermosinus carboxydivorans* Nor1  
 GCF\_900167065.1 *Desulfovibrio bizertensis* DSM 18034  
 GCF\_000341895.1 *Pseudodesulfovibrio piezophilus* C1TLV30  
 GCF\_000817955.1 *Geobacter pickeringii* G13  
 GCF\_000020725.1 *Geobacter bemidjiensis* Bem  
 GCF\_002770725.1 *Pleomorphomonas carboxyditropha* SVCO-16  
 GCF\_900466875.1 Rhizobiales bacterium AFS016371  
 GCF\_900468955.1 Rhizobiales bacterium AFS041951  
 GCF\_900469445.1 Rhizobiales bacterium AFS049984  
 GCF\_900472805.1 Rhizobiales bacterium AFS089140  
 GCF\_900104145.1 *Pseudovibrio* sp. Tun.PSC04-5.I4  
 GCF\_001431305.1 *Pseudovibrio* sp. POLY-S9  
 GCF\_000013745.1 *Rhodopseudomonas palustris* BisB18

*Desulfotomaculum nigrificans*  
*Calderihabitans maritimus*  
*Moorella* sp003116935  
*Moorella stamsii*  
*Moorella stamsii*  
*Moorella thermoacetica*\_A  
*Thermanaeromonas toyohensis*  
 DRI-13 sp000746025  
*Thermincola ferriacetica*  
*Thermincola ferriacetica*  
*Carboxydocella thermautotrophica*  
*Carboxydocella thermautotrophica*  
*Carboxydocella thermautotrophica*  
*Carboxydocella thermautotrophica*  
*Carboxydocella thermautotrophica*  
*Thermosinus carboxydivorans*  
*Desulfovibrio*\_O bizertensis  
*Pseudodesulfovibrio piezophilus*  
*Geobacter pickeringii*  
*Geobacter*\_A bemidjiensis  
*Pleomorphomonas* sp900095415  
*Neorhizobium* unculture\_A<sup>b</sup>  
*Neorhizobium* unculture\_B<sup>b</sup>  
*Neorhizobium* unculture\_B<sup>b</sup>  
*Neorhizobium* unculture\_B<sup>b</sup>  
*Pseudovibrio* sp900104145  
*Pseudovibrio* sp900143565  
*Rhodopseudomonas palustris*\_D

|                 |                                                                             |                                     |
|-----------------|-----------------------------------------------------------------------------|-------------------------------------|
| GCF_000013085.1 | <i>Rhodospirillum rubrum</i> ATCC 11170                                     | <i>Rhodospirillum rubrum</i>        |
| GCF_000225955.1 | <i>Rhodospirillum rubrum</i> F11                                            | <i>Rhodospirillum rubrum</i>        |
| GCF_000981805.1 | <i>Citrobacter amalonaticus</i> Y19                                         | <i>Citrobacter_A amalonaticus_C</i> |
| GCF_000263295.1 | <i>Salmonella enterica</i> subsp. <i>enterica</i> serovar Senftenberg SS209 | <i>Salmonella enterica</i>          |
| GCF_001276695.1 | <i>Salmonella enterica</i> subsp. <i>enterica</i> serovar Montevideo 50262  | <i>Salmonella enterica</i>          |
| GCF_001276745.1 | <i>Salmonella enterica</i> subsp. <i>enterica</i> serovar Senftenberg 50263 | <i>Salmonella enterica</i>          |
| GCF_001276765.1 | <i>Salmonella enterica</i> subsp. <i>enterica</i> serovar Senftenberg 50264 | <i>Salmonella enterica</i>          |
| GCF_001276775.1 | <i>Salmonella enterica</i> subsp. <i>enterica</i> serovar Senftenberg 50265 | <i>Salmonella enterica</i>          |
| GCF_001276825.1 | <i>Salmonella enterica</i> subsp. <i>enterica</i> serovar Senftenberg 50271 | <i>Salmonella enterica</i>          |
| GCF_001276905.1 | <i>Salmonella enterica</i> subsp. <i>enterica</i> serovar Montevideo 50270  | <i>Salmonella enterica</i>          |
| GCF_001276925.1 | <i>Salmonella enterica</i> subsp. <i>enterica</i> serovar Senftenberg 50272 | <i>Salmonella enterica</i>          |
| GCF_000422645.1 | <i>Ferrimonas futtsuensis</i> DSM 18154                                     | <i>Ferrimonas futtsuensis</i>       |
| GCF_000425405.1 | <i>Ferrimonas kyonanensis</i> DSM 18153                                     | <i>Ferrimonas kyonanensis</i>       |
| GCF_900100175.1 | <i>Ferrimonas sediminum</i> DSM 23317                                       | <i>Ferrimonas sediminum</i>         |
| GCF_003797165.1 | <i>Shewanella</i> sp. R106                                                  | GCF_002836275.1                     |
| GCF_003855155.1 | <i>Shewanella</i> sp. M2                                                    | GCF_002836275.1                     |
| GCF_000331515.1 | <i>Photobacterium marinum</i> AK15                                          | <i>Photobacterium marinum</i>       |

---

<sup>a</sup> NCBI taxonomy was used, because GTDB taxonomy was not assigned.

<sup>b</sup> Species-level taxonomy was manually assigned by calculating ANI.

**Table S5** Genomes harboring FirmiCODHech and associated ECH (Group 4 [NiFe] hydrogenase)

| Genome          |                                                                        | FirmiCODHech   |                 | Group 4 [NiFe] hydrogenase catalytic subunit |                |                 |       |
|-----------------|------------------------------------------------------------------------|----------------|-----------------|----------------------------------------------|----------------|-----------------|-------|
| Accession       | Taxonomy                                                               | Accession      | Locus tag       | Sub-clade                                    | Accession      | Locus tag       | Class |
| GCF_000156275.2 | <i>Caldanaerobacter subterraneus</i> subsp. <i>pacificus</i> DSM 12653 | WP_009610668.1 | CDSM653_RS07355 | E4a                                          | WP_009610669.1 | CDSM653_RS07320 | 4a    |
| GCF_000806225.2 | <i>Thermoanaerobacter</i> sp. YS13                                     | WP_042833370.1 | THYS13_RS04710  | E4a                                          | WP_042833365.1 | THYS13_RS04650  | 4a    |
| GCF_000166075.1 | <i>Parageobacillus thermoglucosidasius</i> Y4.1MC1                     | WP_013400775.1 | GY4MC1_RS09120  | F4a                                          | WP_013400781.1 | GY4MC1_RS09155  | 4a    |
| GCF_000178395.2 | <i>Parageobacillus thermoglucosidasius</i> C56-YS93                    | WP_013400775.1 | GEOTH_RS09250   | F4a                                          | WP_013876883.1 | GEOTH_RS09285   | 4a    |
| GCF_000258725.1 | <i>Parageobacillus thermoglucosidasius</i> TNO-09.020                  | WP_003250289.1 | GT20_RS08580    | F4a                                          | WP_003250304.1 | GT20_RS08615    | 4a    |
| GCF_000648295.1 | <i>Parageobacillus thermoglucosidasius</i> NBRC 107763                 | WP_013400775.1 | GT2_RS13950     | F4a                                          | WP_013400781.1 | GT2_RS13985     | 4a    |
| GCF_000966225.1 | <i>Parageobacillus thermoglucosidasius</i> DSM 2542                    | WP_013400775.1 | WH82_RS08365    | F4a                                          | WP_013400781.1 | WH82_RS08330    | 4a    |
| GCF_001295365.1 | <i>Parageobacillus thermoglucosidasius</i> DSM 2542                    | WP_013400775.1 | AOT13_RS13420   | F4a                                          | WP_013400781.1 | AOT13_RS13385   | 4a    |
| GCF_001587555.1 | <i>Parageobacillus thermoglucosidasius</i> B4168                       | WP_003250289.1 | B4168_RS01110   | F4a                                          | WP_003250304.1 | B4168_RS01145   | 4a    |
| GCF_001651535.1 | <i>Parageobacillus thermoglucosidasius</i> GT23                        | WP_003250289.1 | GT23_RS00370    | F4a                                          | WP_003250304.1 | GT23_RS00335    | 4a    |
| GCF_001700985.1 | <i>Parageobacillus thermoglucosidasius</i> NCIMB 11955                 | WP_013400775.1 | BCV53_RS13415   | F4a                                          | WP_013400781.1 | BCV53_RS13380   | 4a    |
| GCF_001902495.1 | <i>Parageobacillus thermoglucosidasius</i> TM242                       | WP_013400775.1 | BCV54_RS13805   | F4a                                          | WP_013400781.1 | BCV54_RS13770   | 4a    |
| GCF_003865195.1 | <i>Parageobacillus thermoglucosidasius</i> TG4                         | WP_125009789.1 | PTHTG4_RS08120  | F4a                                          | WP_125009791.1 | PTHTG4_RS08155  | 4a    |
| GCF_000007085.1 | <i>Caldanaerobacter subterraneus</i> subsp. <i>tengcongensis</i> MB4   | WP_011025912.1 | TTE_RS08175     | F4a                                          | WP_009610669.1 | TTE_RS08140     | 4a    |
| GCF_000473865.1 | <i>Caldanaerobacter subterraneus</i> subsp. <i>yonseiensis</i> KB-1    | WP_022587816.1 | O163_RS22180    | F4a                                          | WP_022587809.1 | O163_RS22145    | 4a    |
| GCF_003116935.1 | <i>Moorella</i> sp. Hama-1                                             | WP_109207247.1 | Hama1_RS10675   | F4a                                          | WP_109207254.1 | Hama1_RS10710   | 4a    |
| GCF_001373375.1 | <i>Moorella glycerini</i> NMP                                          | WP_054936715.1 | BN1230_RS08005  | F4a                                          | WP_054936708.1 | BN1230_RS07970  | 4a    |
| GCF_002995805.1 | <i>Moorella stamsii</i> DSM 26271                                      | WP_054936715.1 | MOST_RS16220    | F4a                                          | WP_054936708.1 | MOST_RS16185    | 4a    |
| GCF_001875325.1 | <i>Moorella thermoacetica</i> DSM 21394                                | WP_075516371.1 | MOTE_RS04415    | F4a                                          | WP_075516364.1 | MOTE_RS04380    | 4a    |
| GCF_900176005.1 | <i>Thermanaeromonas toyohensis</i> ToBE                                | WP_084664092.1 | B9A14_RS03610   | F4a                                          | WP_084664078.1 | B9A14_RS03575   | 4a    |
| GCF_000012865.1 | <i>Carboxydotherrnus hydrogenoformans</i> Z-2901                       | WP_011344718.1 | CHY_RS08505     | F4c1                                         | WP_011344721.1 | CHY_RS08520     | 4c    |
| GCF_001950325.1 | <i>Carboxydotherrnus islandicus</i> SET                                | WP_075865517.1 | ciss_RS06710    | F4c1                                         | WP_075865520.1 | ciss_RS06725    | 4c    |
| GCF_000214435.1 | <i>Desulfotomaculum nigrificans</i> CO-1-SRB                           | WP_013809564.1 | DESCA_RS01885   | F4c1                                         | WP_013809561.1 | DESCA_RS01870   | 4c    |
| GCF_002207765.1 | <i>Calderihabitans maritimus</i> KKC1                                  | WP_088553704.1 | KKC1_RS06675    | F4c1                                         | WP_088553703.1 | KKC1_RS06665    | 4c    |
| GCF_000746025.1 | Clostridiales bacterium DRI-13                                         | WP_034425146.1 | BR63_RS15745    | F4c1                                         | WP_034425152.1 | BR63_RS15760    | 4c    |

|                 |                                                |                |                   |      |                |                   |    |
|-----------------|------------------------------------------------|----------------|-------------------|------|----------------|-------------------|----|
| GCF_002049255.1 | <i>Carboxydocella</i> sp. ULO1                 | WP_078665971.1 | ULO1_RS08880      | F4c1 | WP_078665968.1 | ULO1_RS08895      | 4c |
| GCF_002049395.1 | <i>Carboxydocella</i> sp. JDF658               | WP_078665971.1 | JDF658_RS09120    | F4c1 | WP_079907326.1 | JDF658_RS09135    | 4c |
| GCF_003047205.1 | <i>Carboxydocella thermautotrophica</i> 19     | WP_078665971.1 | CFE_RS00860       | F4c1 | WP_078665968.1 | CFE_RS00845       | 4c |
| GCF_003054495.1 | <i>Carboxydocella thermautotrophica</i> 41     | WP_078665971.1 | CTH_RS00865       | F4c1 | WP_078665968.1 | CTH_RS00850       | 4c |
| GCF_900167165.1 | <i>Carboxydocella sporoproducens</i> DSM 16521 | WP_078665971.1 | B5D20_RS09335     | F4c1 | WP_078665968.1 | B5D20_RS09320     | 4c |
| GCF_000169155.1 | <i>Thermosinus carboxydivorans</i> Nor1        | WP_007288856.1 | TCARDRAFT_RS04635 | F4c1 | WP_007288859.1 | TCARDRAFT_RS04650 | 4c |
| GCF_001936615.1 | <i>Desulfosporosinus</i> sp. OL                | WP_075366373.1 | DSOL_RS18930      | F4c2 | WP_075366375.1 | DSOL_RS18945      | 4c |
| GCF_000092945.1 | <i>Thermincola potens</i> JR                   | WP_013121776.1 | THERJR_RS14890    | F4c2 | WP_013121779.1 | THERJR_RS14905    | 4c |
| GCF_001263415.1 | <i>Thermincola ferriacetica</i> Z-0001         | WP_052217746.1 | Tfer_RS07525      | F4c2 | WP_052217742.1 | Tfer_RS07510      | 4c |

---

**Table S6** Read statistics of amplicon sequencing in the CODHech-mock community sample

| <b>Primer sets</b> | <b>Total reads</b> | <b>Merged QC reads</b> | <b>Denoised chimera-free reads</b> | <b>CODH reads</b> | <b>CODH-OTUs</b> |
|--------------------|--------------------|------------------------|------------------------------------|-------------------|------------------|
| F4a_p1             | 122,285            | 88,442                 | 42,364                             | 42,354            | 43               |
| F4c1_p1            | 65,790             | 57,720                 | 30,129                             | 30,129            | 3                |
| F4c1_p2            | 64,059             | 54,321                 | 28,610                             | 28,610            | 2                |



**Table S7** Environmental CODH-OTUs classified into FirmiCODHech subclades

| CODH-OTUs*       | Sub-clades | Closest CODHech genes |                                                  | Relative abundance in each primer set (%) |        |        |
|------------------|------------|-----------------------|--------------------------------------------------|-------------------------------------------|--------|--------|
|                  |            | Locus tag             | Taxon                                            | Identity (%)                              | UN     | JI     |
| <b>F4c1_p1_1</b> | F4c1       | CHY_RS08505           | <i>Carboxydotherrmus hydrogenoformans</i> Z-2901 | <b>93.8</b>                               | 0.017  | 0      |
| F4c1_p1_3        | F4c1       | DESCA_RS01885         | <i>Desulfotomaculum nigrificans</i> CO-1-SRB     | 98.2                                      | 85.599 | 0      |
| F4c1_p1_4        | F4c1       | DESCA_RS01885         | <i>Desulfotomaculum nigrificans</i> CO-1-SRB     | 98.7                                      | 13.975 | 0      |
| F4c1_p1_6        | F4c1       | DESCA_RS01885         | <i>Desulfotomaculum nigrificans</i> CO-1-SRB     | 99.1                                      | 0.327  | 0      |
| F4c1_p1_7        | F4c1       | DESCA_RS01885         | <i>Desulfotomaculum nigrificans</i> CO-1-SRB     | 99.3                                      | 0.082  | 0      |
| F4c1_p2_2        | F4c1       | DESCA_RS01885         | <i>Desulfotomaculum nigrificans</i> CO-1-SRB     | 99.1                                      | 85.566 | 0      |
| F4c1_p2_6        | F4c1       | DESCA_RS01885         | <i>Desulfotomaculum nigrificans</i> CO-1-SRB     | 99.8                                      | 13.624 | 0      |
| F4c1_p2_19       | F4c1       | JDF658_RS09120        | <i>Carboxydocella</i> sp. JDF658                 | 100                                       | 0.811  | 0      |
| F4c2_p1_1        | F4c2       | THERJR_RS14890        | <i>Thermincola potens</i> JR                     | 97                                        | 0      | 99.994 |
| F4c2_p1_2        | F4c2       | Tfer_RS07525          | <i>Thermincola ferriacetica</i> Z-0001           | 99.8                                      | 0      | 0.005  |
| F4c2_p1_3        | F4c2       | Tfer_RS07525          | <i>Thermincola ferriacetica</i> Z-0001           | 99.3                                      | 0      | 0.002  |

\* CODH-OTU names were represented in the name of primer set which amplified it, and number identifier of the CODH-OTU, which were concatenated with “\_” characters. CODH-OTUs which showed <94.5% identity with the closest CODHech genes were shown in bold.

**Table S8** CODH-OTUs in CO-enriched samples classified into FirmiCODHech subclades

| CODH-OTUs*       | Sub-clades | Closest CODHech genes |                                                  | Identity (%) | Relative abundance in each primer set (%) |               |
|------------------|------------|-----------------------|--------------------------------------------------|--------------|-------------------------------------------|---------------|
|                  |            | Locus tag             | Taxon                                            |              | JI_enriched_1                             | JI_enriched_2 |
| <b>F4a_p1_5</b>  | F4a        | Hama1_RS10675         | <i>Moorella</i> sp. Hama 1                       | <b>85.7</b>  | 9.854                                     | 0             |
| <b>F4a_p1_7</b>  | F4a        | Hama1_RS10675         | <i>Moorella</i> sp. Hama 1                       | <b>85.7</b>  | 8.355                                     | 0             |
| <b>F4a_p1_10</b> | F4a        | B9A14_RS03610         | <i>Thermanaeromonas toyohensis</i> ToBE          | <b>92.9</b>  | 1.981                                     | 0             |
| <b>F4c1_p1_1</b> | F4c1       | CHY_RS08505           | <i>Carboxydotherrmus hydrogenoformans</i> Z-2901 | <b>93.8</b>  | 99.997                                    | 0.002         |
| <b>F4c1_p1_2</b> | F4c1       | CHY_RS08505           | <i>Carboxydotherrmus hydrogenoformans</i> Z-2901 | <b>93.4</b>  | 0.002                                     | 99.997        |
| F4c1_p1_3        | F4c1       | DESCA_RS01885         | <i>Desulfotomaculum nigrificans</i> CO-1-SRB     | 98.2         | 0                                         | 0.002         |
| F4c1_p1_4        | F4c1       | DESCA_RS01885         | <i>Desulfotomaculum nigrificans</i> CO-1-SRB     | 98.7         | 0.001                                     | 0             |
| <b>F4c1_p2_1</b> | F4c1       | DESCA_RS01885         | <i>Desulfotomaculum nigrificans</i> CO-1-SRB     | <b>89.2</b>  | 0.061                                     | 100           |
| <b>F4c1_p2_3</b> | F4c1       | DESCA_RS01885         | <i>Desulfotomaculum nigrificans</i> CO-1-SRB     | <b>88.5</b>  | 99.922                                    | 0             |
| F4c1_p2_6        | F4c1       | DESCA_RS01885         | <i>Desulfotomaculum nigrificans</i> CO-1-SRB     | 99.8         | 0.009                                     | 0             |
| F4c1_p2_19       | F4c1       | JDF658_RS09120        | <i>Carboxydocella</i> sp. JDF658                 | 100          | 0.009                                     | 0             |
| F4c2_p1_1        | F4c2       | THERJR_RS14890        | <i>Thermincola potens</i> JR                     | 97           | 2.903                                     | 99.904        |
| F4c2_p1_2        | F4c2       | Tfer_RS07525          | <i>Thermincola ferriacetica</i> Z-0001           | 99.8         | 89.416                                    | 0.005         |
| F4c2_p1_3        | F4c2       | Tfer_RS07525          | <i>Thermincola ferriacetica</i> Z-0001           | 99.3         | 6.3                                       | 0.001         |
| F4c2_p1_9        | F4c2       | Tfer_RS07525          | <i>Thermincola ferriacetica</i> Z-0001           | 99.1         | 1.025                                     | 0             |
| F4c2_p1_76       | F4c2       | THERJR_RS14890        | <i>Thermincola potens</i> JR                     | 98.1         | 0.027                                     | 0             |
| F4c2_p1_89       | F4c2       | Tfer_RS07525          | <i>Thermincola ferriacetica</i> Z-0001           | 98.4         | 0.015                                     | 0             |
| F4c2_p1_95       | F4c2       | Tfer_RS07525          | <i>Thermincola ferriacetica</i> Z-0001           | 98.4         | 0.012                                     | 0             |
| F4c2_p1_103      | F4c2       | THERJR_RS14890        | <i>Thermincola potens</i> JR                     | 98.4         | 0.011                                     | 0             |
| F4c2_p1_121      | F4c2       | THERJR_RS14890        | <i>Thermincola potens</i> JR                     | 97.7         | 0.008                                     | 0             |
| F4c2_p1_122      | F4c2       | THERJR_RS14890        | <i>Thermincola potens</i> JR                     | 98.1         | 0.008                                     | 0             |
| F4c2_p1_133      | F4c2       | THERJR_RS14890        | <i>Thermincola potens</i> JR                     | 97.9         | 0.005                                     | 0             |

\* CODH-OTU names were represented in the name of primer set which amplified it, and number identifier of the CODH-OTU, which were concatenated with “\_” characters. CODH-OTUs which showed <94.5% identity with the closest CODHech genes were shown in bold.

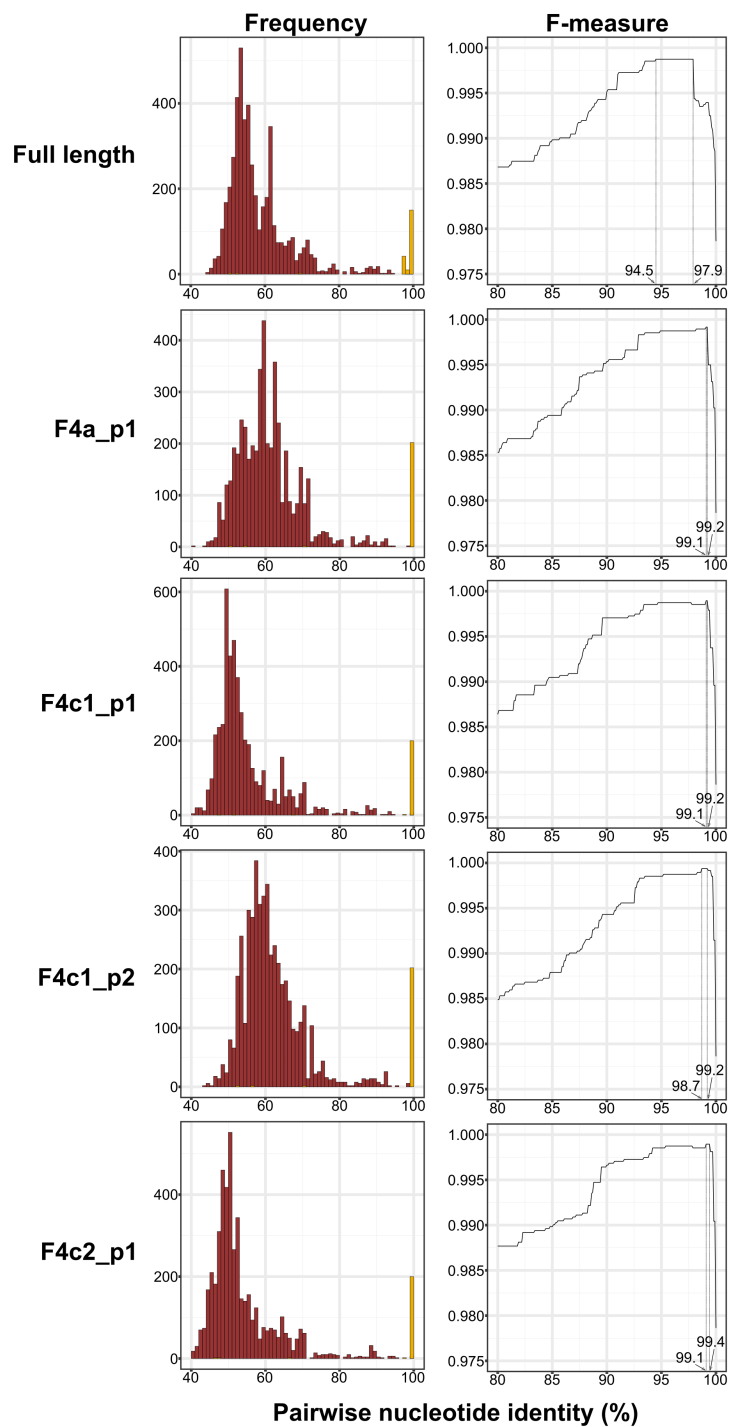

**Fig. S1** Optimal thresholds for species classifications of CODHech genes. Pairwise sequence identity distribution (left) and F-measure (right) based on all CODHech genes. Each color represents the pairwise nucleotide identity calculations between two strains belonging to the same species (yellow) and belonging to different species (red) in left columns. Each row shows the result of the same analysis using different data set without trimming (full length) or with trimming into each primer set region (others).

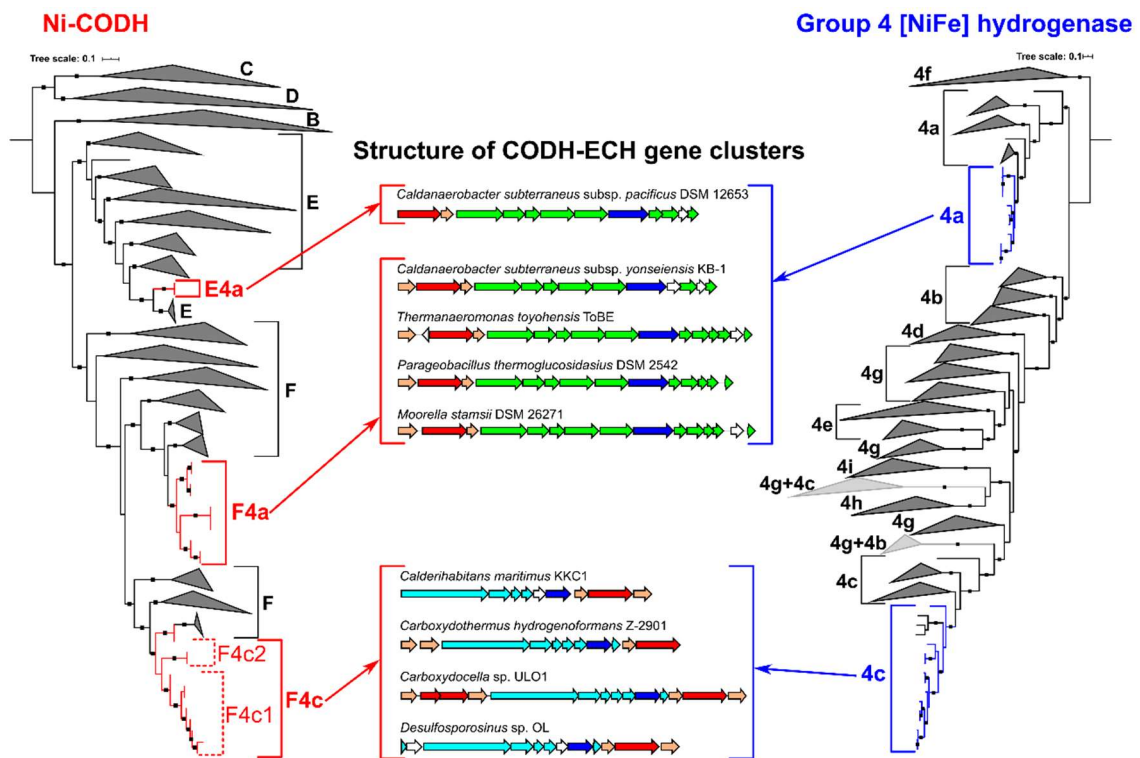

**Fig. S2** Structural and phylogenetic classification of CODH–ECH gene clusters. Phylogenetic trees of CODH genes and Group 4 [NiFe] hydrogenase catalytic subunit genes are shown on the left and right, respectively. The names of major clades are shown in black characters and branches in the trees based on previous studies (Inoue *et al.* 2019b; Søndergaard *et al.* 2016; Techtmann *et al.* 2012). Black squares indicate >0.8 support by bootstrap values. Structures of representative CODH–ECH gene clusters are shown at the center. Red = CODH and, and blue = Group 4 [NiFe] hydrogenase catalytic subunit genes within the CODH–ECH gene clusters. Orange arrows indicate CODH-related genes (*cooF* or *cooC*). Light green and light blue arrows indicate Group 4a and 4c [NiFe] hydrogenase related genes, respectively.

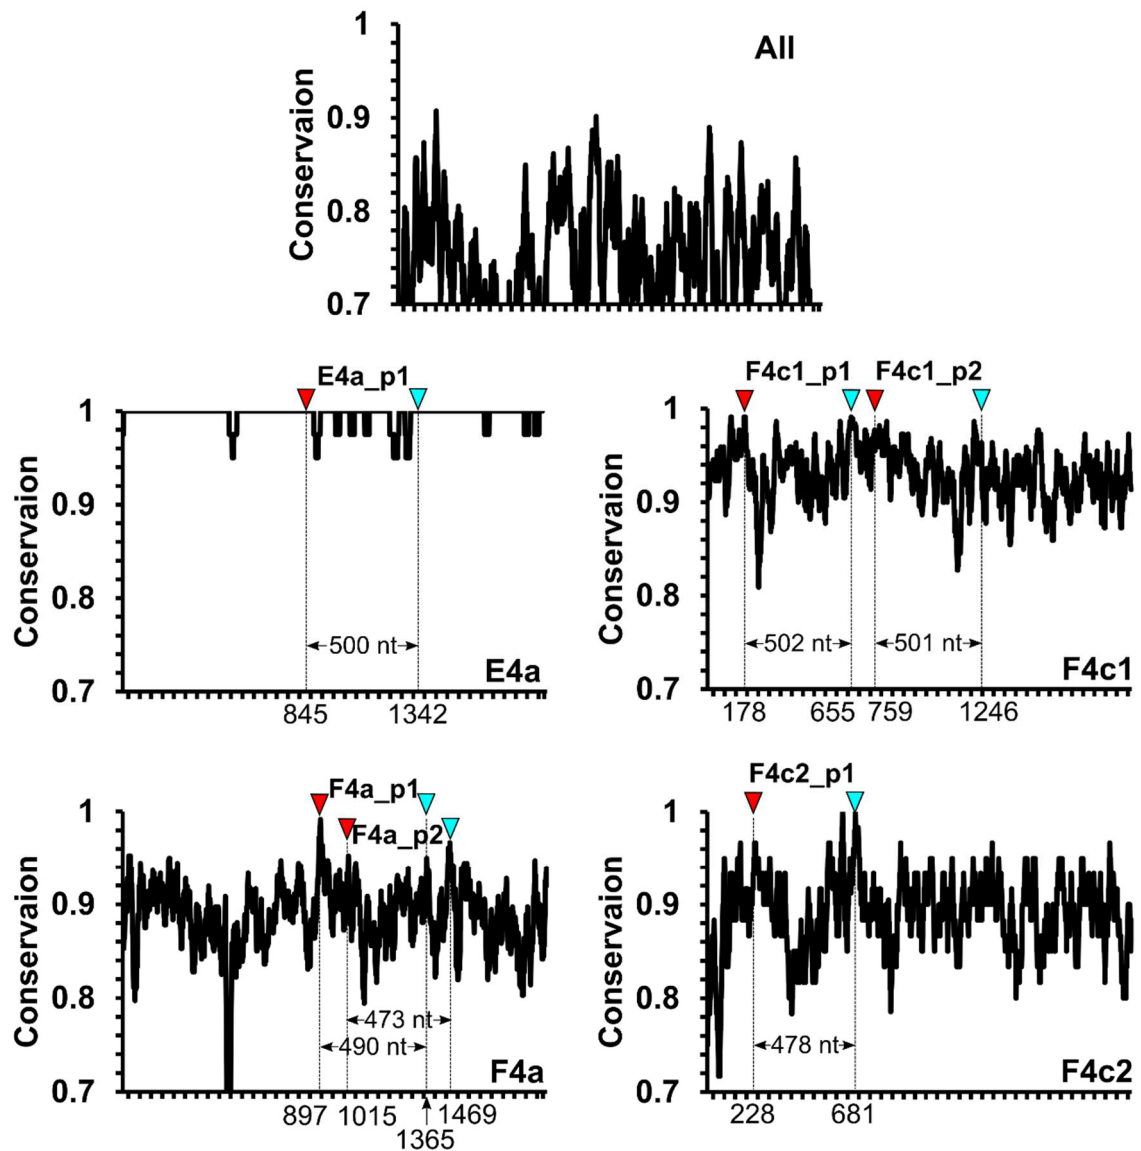

**Fig. S3** Conservation of FirmiCODHech nucleotide sequences and primer regions. The average ratio of dominant base to all bases at each position in a 20-base sliding window was calculated and shown in each multiple sequence alignment: “All” indicates that all 34 FirmiCODHech genes were used, and E4a, F4a, F4a1, and F4c2 indicate only the FirmiCODHech genes of each subclade were used. Red and light blue arrow heads indicate the positions of the forward and reverse primers of each new primer set, respectively. The primer set names are shown between the arrow heads and the expected amplicon size is shown on the graph.



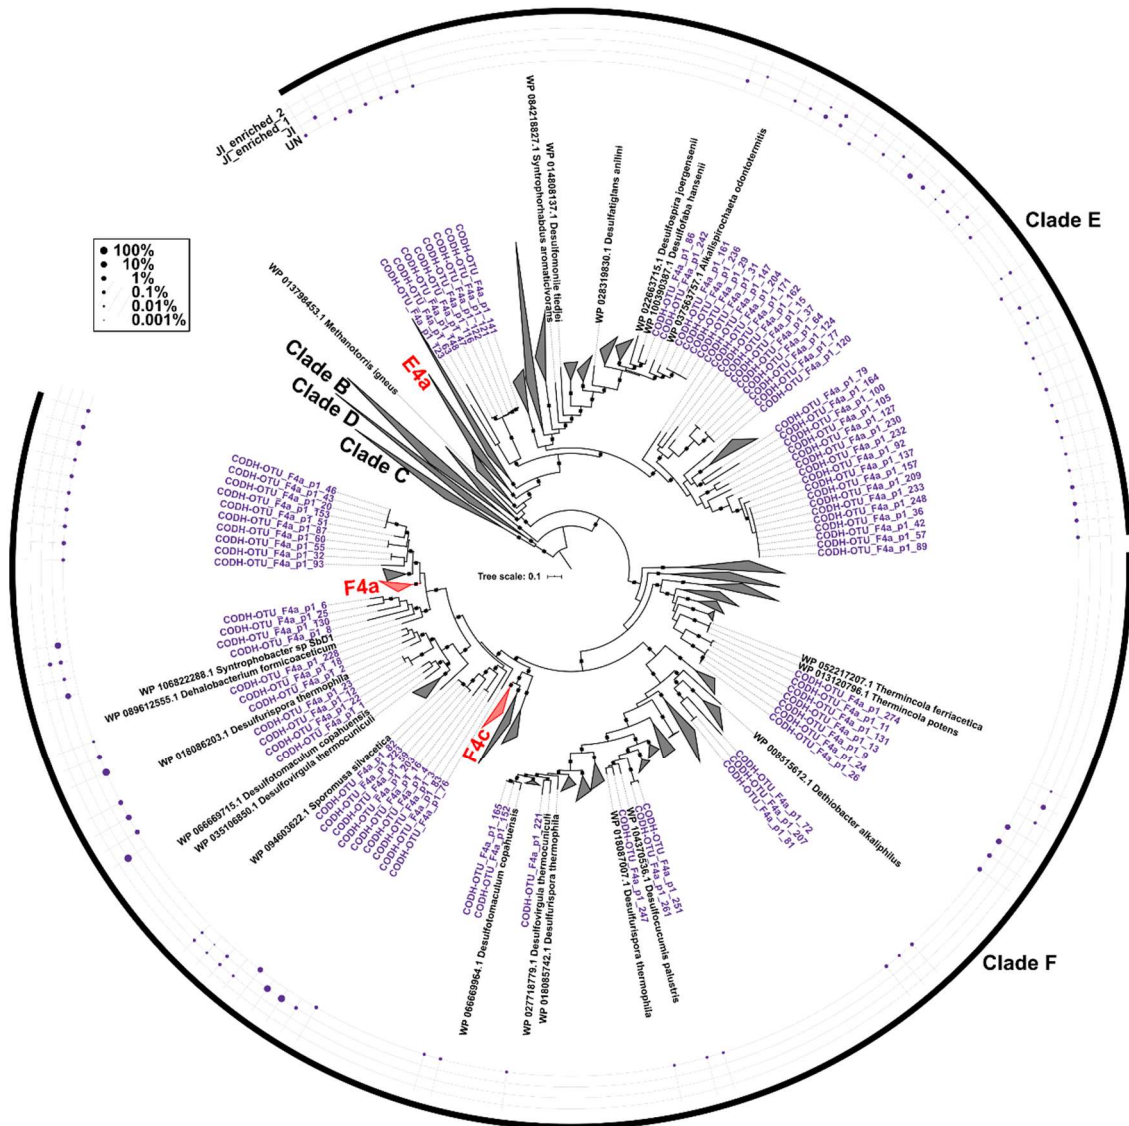

**Fig. S5** Phylogeny of ‘noisy CODH-OTUs’ amplified by the F4a\_p1 from the environmental and enrichment samples. The tree was constructed using an alignment of 1,558 CODH proteins and the CODH-OTUs. Major clades, B through F, are indicated. Colors of branches and leaves indicate the following: red, FirmiCODHechs; black, other CODHs; purple, CODH-OTUs. The relative abundance of CODH-OTUs is shown in the bubble plot. The black squares on the branch indicate >0.8 support by bootstrap values.

**A**

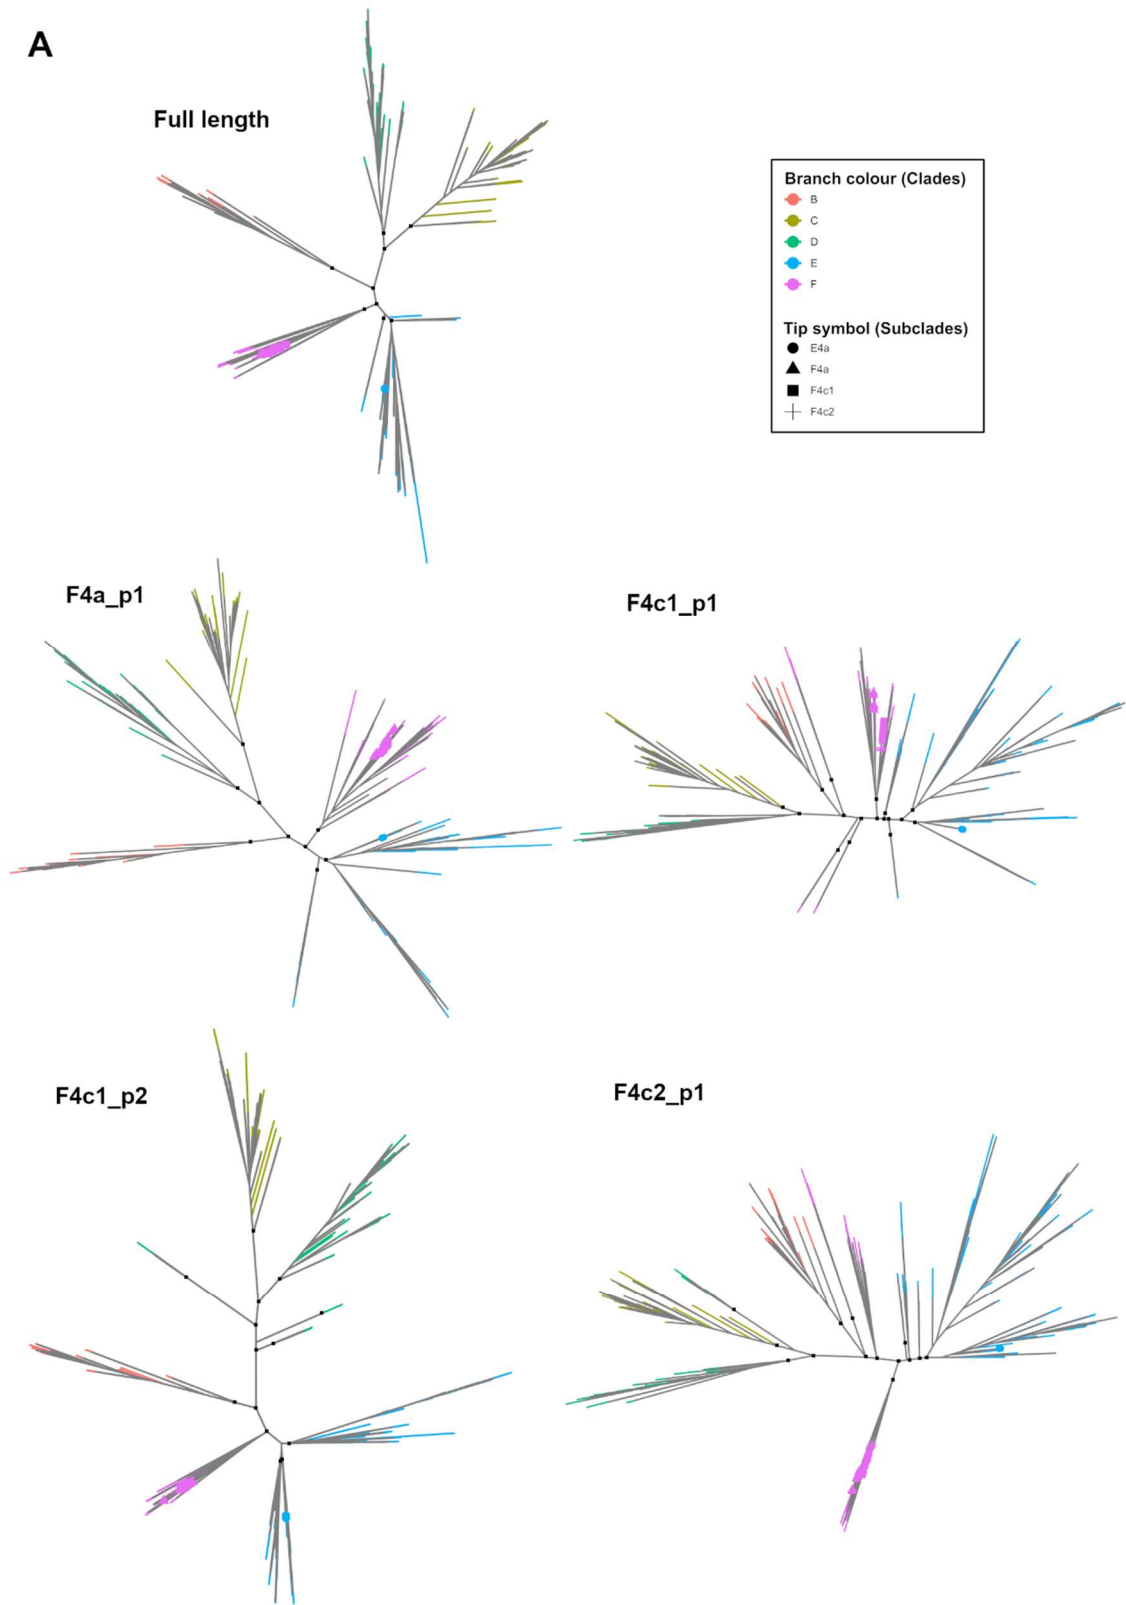



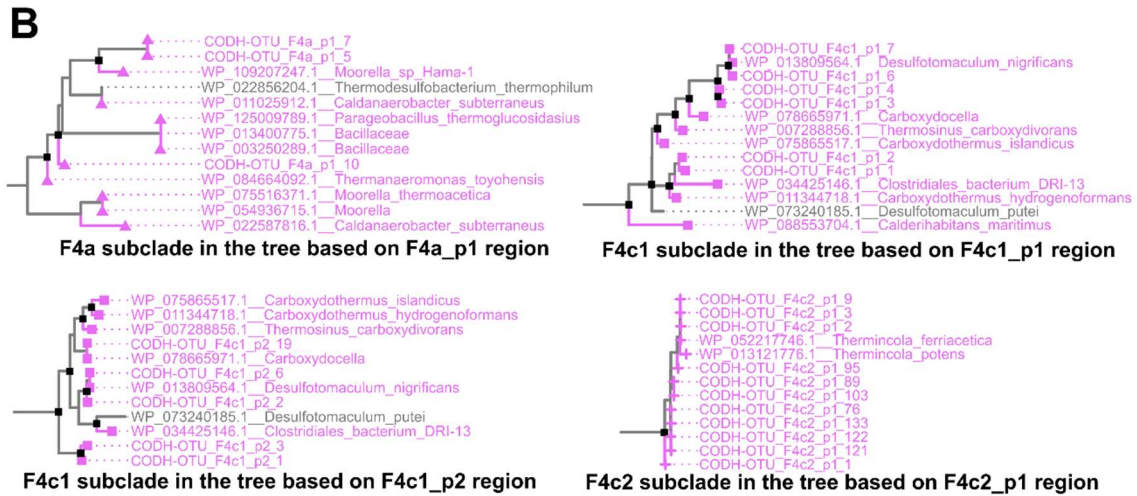

**Fig. S6** Phylogeny of the CODH genes and the CODH-OTUs based on different amplification regions of each primer set. Overall unrooted trees (A) and zoom up of FirmiCODHech subclades in each tree (B). The trees were constructed using alignments of 1,558 CODH proteins and the 25 CODH-OTUs obtained from enriched or environmental samples. While the “Full length” tree was constructed from the multiple sequence alignment without trimming (i.e. it is the same tree as Fig. 3), the other trees (“F4a\_p1”, “F4c1\_p1”, “F4c1\_p2” and “F4c2\_p1”) were constructed based on the alignments which were trimmed into the CODH-OTU regions of each primer set. Major clades B through F are indicated by different branch colours. FirmiCODHech subclades are indicated by different symbols on the tips. The black squares on the branch indicate >0.8 support by bootstrap values.

**Data S1** Nucleotide sequences of the CODH-OTUs that were classified into the FirmiCODHech subclades

>CODH-OTU\_F4c1\_p1\_1

ACCCAGAGAGGGGTTGTGGGGCTGATGCTCATACCATTGTTGCGCGAAATTTGATTAGAATGATTGCTGCAGGTGCT  
GCTGCCATTCCGAGCACGGCCGACACATAGCTTTGACTTTATTAGAAGTTGGCGAAGGACATGCACCGGCGTACCGG  
ATTAGAGACGAGCAAAAAGTTAAGAAATATAGCGGAAAAATTAACCTGGCACCGGCAGGCAAAAATATAAGACAAGT  
GGCAAAAAGAAGTGGCTTTAGCTTCCCTGGAAGATTACTCGCGGCAGAAGCAAAACGTACCCTGTACCTGGGCCAAAAG  
AGACCTTGACCGCTGAGCGGGTGGACAAACTGGCAGAACTGGGGGTTATGCCCCACAATATCGATGCAGTTATACCGG  
AGATTATGGGTGCAACTCATGTGGGTTGTGATGCCGATGCAGTCAACGTTTTGCTCGGCGGCT

>CODH-OTU\_F4c1\_p1\_2

ACCCAGAGAGGGGTTGTGGGGCTGATGCTCATACCATTGTTGCGCGAAATTTGATTAGAATGATTGCTGCAGGTGCT  
GCTGCCATTCCGAGCACGGCCGACACATAGCTTTGACTTTACTAGAAGTTGGCGAAGGACATGCACCGGCGTACCGG  
ATTAAGACGAGCAAAAAGTTAAGAAATATAGCGGAAAAATTAACCTGGCACCGGCAGGCAAAAGATGTAAGACAAGT  
GGCAAAAAGAAGTGGCTTTAGCTTCCCTGGAAGATTACTCACGGCAGAAGCAAAACGTACCCTGTACCTGGGCCAAAAG  
AGACCTTGACCGCTGAACGGGTGGACAAACTGGCAGAACTAGGGGTTATGCCCCACAATATCGATGCAGTTATACCGG  
AGATTATGGGCCGAACTCATGTGGGTTGTGATGCCGATGCAGTCAACGTTTTGCTCGGCGGCT

>CODH-OTU\_F4c1\_p1\_3

ACCGCAGAGAGGAGTTGTGGAGCTGATGCCAATACTATTGTGGCTCGAAATTTGGCCAGAATGATTGCTGGAGGTGC  
TGCTTCCATTCCGATCACGGTCGGCACATAGCTTTAACTTTATTAGAAGTTGGCGAAGGTCATGCACCTGCGTACCGG  
ATCAAAGATGAGCAAAAAGCTAAGAAGTATAGCAGAAAAATTAACCTGGCACCGGCAGACAAAAGACATAAGGC AATT  
GGCAAAAAGAAGTGGCTCTAGCTTCCCTGGAGGATTACTCGCGTCAGAATAATAGCATACCTTGTAACCTGGTCCAAAGCG  
ACCATGACTGCTGAACGGGTGGATAAATTGGTAGATCTGGGGGTTATGCCGCATAATATTGATGCTGTTATCGCCGAAAT  
TATGGCTCGAACTCATGTAGGTTGTGATGCTGATGCAGCCAATATTTACTCGGCGGAT

>CODH-OTU\_F4c1\_p1\_4

ACCGCAGAGAGGAGTTGTGGAGCTGATGCCAATACTATTGTGGCTCGAAATTTGGCCAGAATGATTGCTGGAGGTGC  
TGCTTCCATTCCGATCACGGTCGGCACATAGCTTTAACTTTATTAGAAGTTGGCGAAGGTCATGCACCTGCGTACCGG  
ATCAAAGATGAGCAAAAAGCTAAGAAGTATAGCAGAAAAATTAACCTGGCACCGGCAGACAAAAGACATAAGGC AAGT  
GGCAAAAAGAAGTGGCTCTAGCTTCCCTGGAGGATTACTCGCGTCAGAATAATAGCATACCTTGTAACCTGGTCCAAAGCG  
ACCATGACTGCTGAACGGGTGGATAAATTGGTAGATCTGGGGGTTATGCCGCATAATATTGATGCTGTTATCGCCGAAAT  
TATGGCTCGAACTCATGTAGGTTGTGATGCTGATGCAGCCAACATTTACTCGGCGGAT

>CODH-OTU\_F4c1\_p1\_6

ACCGCAGAGAGGAGTTGTGGAGCTGATTCCAATACTATTGTGGCTCGAAATTTGGCCAGAATGATTGCTGGAGGTGC  
GCTTCCATTCCGATCACGGTCGGCACATAGCTTTAACTTTATTAGAAGTTGGCGAAGGTCATGCACCTGCGTACCGGAT  
CAAAGATGAGCAAAAAGCTAAGAAGTATAGCAGAAAAATTAACCTGGCACCGGCAGACAAAAGACATAAGGCAAGTGG  
CAAAAAGAAGTGGCTCTAGCTTCCCTGGAAGACTACTCGCGTCAGAATTATAGCATACCTTGTAACCTGGACCAAATCGAC  
CATGACTGCTGAACGGGTGGATAAATTGGTAGATCTGGGGATTATGCCGCATAATATTGATGCTGTTATCGCCGAAATTAT  
GGCTCGAACTCATGTAGGTTGTGATGCTGATGCAGCCAACATTTACTCGGCGGAT

>CODH-OTU\_F4c1\_p1\_7

ACCGCAGAGAGGAGTTGTGGAGCTGATGCCAATACTATTGTGGCTCGAAATTTGGCCAGAATGATTGCTGGAGGTGC  
TGCTTCCATTCCGATCACGGTCGGCACATAGCTTTAACTTTATTAGAAGTTGGCGAAGGTCATGCACCTGCGTACCGG  
ATCAAAGATGAGCAAAAAGCTAAGAAGTATAGCAGAAAAATTAACCTGGCACCGGCAGACAAAAGACATAAGGC AAGT  
GGCAAAAAGAAGTGGCTCTAGCTTCCCTGGAAGACTACTCGCGTCAGAATTATAGCATACCTTGTAACCTGGACCAAATCG  
ACCATGACTGCTGAACGGGTGGATAAATTGGTAGATCTGGGGATTATGCCGCATAATATTGATGCTGTTATCGCCGAAAT  
TATGGCTCGAACTCATGTAGGTTGTGATGCTGATGCAGCCAACATTTACTCGGCGGAT

>CODH-OTU\_F4c1\_p2\_1

TGTCAACATCGGGTTCATGGTCACAACCCTGTGCTTAGTGAGATTAATTTGTGATGTAGCGCTGAAGATGAAAGAAGAA  
GCTGAGAAAGCCGGGGCTAAAGAAGGTATTAACATAGTGGGTATTTGCTGTACTGGTAATGAGGTAATGATGCGACGGG  
GAATTCCTCTGGCTACCAACTACCTGTCCAGGAACTGGCCATAATTACAGGCGCTGTAGATGCTATGGTCGTAGACGT  
GCAGTGTATTATGCCTGCTATTACCAGCTTAGCAGAGTGTTCATACAGAAATAATTACCCTATGCCGGTAAACAAAA  
TTCCTGGCGCAACGCATGTAGAGTTTCGTGAGGATTCAGCGATAGAAAGTGCAGGAGAAAAATTGTTGAACTGGCAATTG  
AGGCTTTTAAAAGACGGGACAAGCAAAAAGTTAACATTCCTGACTACAAGCAAAACAGCCATTGCC

>CODH-OTU\_F4c1\_p2\_2

TGTCAACATTGCGGTTACGGTCATAACCCGTTACTTAGTGAAATTTGTTGTGATGTAGCGCTGAAGATGAATGAAGAA

GCTAAAAAAGCCGGGGCCAAGGAAGGTATTAACATAGTGGGTATTTGCTGTACGGGTAACGAGGTGATGATGCGACGA  
GGGATTCCTCTGGCTACTAACTATCTGTCCCAGGAAATGGCCATAATTACAGGTGCTGTAGATGCTATGGTCGTAGATGT  
GCAATGTATTATGCCTGCTATTACCGGCGTAGCTGAGTGTTCATACTGAAATAATTACCACTATGCCTGTAAATAAAAT  
CACTGGTGC AACTCACATAGAGTTTCGTGAAGACTCGGCCATAGACAGTGCCAGAAAAATTGTTGAGGTGGCAATTGA  
TGCCTTTAAAAGACGGGACAGGCGAAAGGTTAACATTCCTGACTACAAGCAAACAGCCATTGCA

>CODH-OTU\_F4c1\_p2\_3

TGTCAACATCGCGGTTATGCCCCAACCCCTGTGCTTAGTGAGATTATTTGTGATGTAGCGCTGAAGATGAAAGAAGAA  
GCTGAGAAAAGCCGGGGCTAAAGAAGGTATTAACATAGTGGGTATTTGCTGTACTGGTAATGAGGTGATGATGCGACGG  
GGAATTCCTCTGGCTACCAACTACCTGTCCCAGAACTGGCCATAATTACAGGCGCTGTAGATGCTATGGTCGTAGACG  
TGCAGTGTATTATGCCTGCTATTACAGCTTAGCAGAGTGTTCATACAGAAATAATTACCACTATGCCGGTAAACAAA  
ATTCTGGCGCAACGCACGTAGAGTTTTGTGAGGATTCAGCGATAGAAAAGTGGGAGAAAATTGTTGAATTGGCAATT  
GAGGCCTTTAAAAGACGGGACAAGCAAAAAGTTAACATTCCTGACTACAAGCAAACAGCCATTGCTG

>CODH-OTU\_F4c1\_p2\_6

TGTCAACATTGCGGTTACGGTTCATAACCCGTTACTTAGTGAAATTGTTTGTGATGTAGCGCTGAAGATGAATGAAGAA  
GCTAAAAAAGCCGGGGCCAAGGAAGGTATTAACATAGTGGGTATTTGCTGTACGGGTAACGAGGTGATGATGCGACGA  
GGGATTCCTCTGGCTACTAACTATCTGTCCCAGGAAATGGCCATAATTACAGGTGCTGTAGATGCTATGGTCGTAGATGT  
GCAATGTATTATGCCTGCTATTACCGGCGTAGCTGAGTGTTCATACTGAAATAATTACCACTATGCCTGTAAATAAAAT  
CACTGGTGC AACTCACATAGAGTTTCGTGAAGACTCGGCCATAGACAGTGCCAGAAAAATTGTAGAACTGGCAATTGA  
TGCCTTTAAAAGACGGGACAGGCGAAAGGTTAACATTCCTGACTACAAGCAAACAGCCATTGCA

>CODH-OTU\_F4c1\_p2\_19

TGTTAACATTGCGGTTACGGTTCATAACCCGTTACTTAGTGAAATTATTTGTGATGTGCGGTTGAAAATGAATGAAGAA  
CCAAGAAAAGCCGGGGCCAAGACGGTATTAACATAGTGGGTATTTGTTGTACGGGTAATGAGGTGATGATGCGACGGG  
GGATTCCGCTGGCTACTAACTATCTATCCAGGAAATGGCCATAGTTACAGGCGCTGTAGATGCGATGGTCGTAGATGTG  
CAGTGCATTATGCCTGCTCTTACCAGTGTAGCGGAGTGTTCATACTGAAGTAATCACCCTATGCCTGTAAATAAAAT  
CACTGGCGCCACTCACATAGAGTTTCGGGAAGAAATCGGCTGTGGAAGCGCCAGGAAAATCGTAGAAGTGGCAATTG  
AGGCCTTTAAAAGACGGGATAAGCGCAAGGTCAACATTCCTGACTACAAGCAAACAGCCATTGCC

>CODH-OTU\_F4c2\_p1\_1

AGAAACCTGATCAGGGGCATCGCGGCAGGAGCGGCCGCTCATTCCGACCATGGACGGCATATTGCTCTTACTTTGTTAG  
AAGTGGCTGAGGGCCATGCCCCGGCGTACTGTATAAAAGATGAGGAAAAAATTAATGCACGTCGCCGCCAGGCTGGGGC  
TGTCCACCGAAGGC AAAAATGTCAGACAGGTGGCCAAAGAGGTAGCCCTGGCTACGCTGGAAGATTTTCCCGGCAG  
GATTCCAGTATTCCCTGCAGTTGGGCCAGGCAAACGATGACCGCTGAGCGTGCTGAAAAGCTGACTGCCCTTGGCGTC  
ATGCCGCATAATATTGATGCTGTTGTAGCAGGCATTATGCACCGAACTCATGTAGGATGTGACGCTGATGCGGTTAACCT  
GTTGCTTGGCGGTTTGAAGGGGCGCTGGCCGACTAT

>CODH-OTU\_F4c2\_p1\_2

AGAAATCTGATCAGGGGCATCGCGGCAGGAGCGGCCGCTCATTCCGACCATGGACGGCATATTGCTCTTACTTTGTTAG  
AAGTAGCTGAGGGCCATGCCCCGGCGTACTGCATAAAAGATGAAAAAATAATGAGCGTCGCCGCCAGGCTGGGGC  
TGTCCACCGAAGGC AAAAATGTCAGGCAGGTGGCCAAAGAGGTAGCCCTGGCTACGCTGGAGGATTTTCCCGGCAG  
AATTCCAGTATTCCCTGCAGTTGGGCCAGGCAAACGATGACCGCTGAGCGTGCTGAAAAGCTGACTGCCCTTGGCGTC  
ATGCCGCATAATATTGATGCTGTTGTAGCAGGCATTATGAATCGCACTCACGTAGGATGTGATGCTGATCCGGTTAACCT  
GTTGCTTGGCGGTTTGAAGGGGCGCTGGCCGACTAT

>CODH-OTU\_F4c2\_p1\_3

AGAAACCTGATCAGGGGCATCGCGGCGGGAGCGGCCGCTCATTCCGACCATGGACGGCATATTGCTCTTACTTTGTTAG  
AAGTGGCTGAGGGCCATGCCCCGGCGTACTGCATAAAAGATGAAAAAATAATGAGCGTCGCCGCCAGGCTGGGGC  
CTGTCCACTGAAGGC AAAAATGTCAGGCAGGTGGCCAAAGAGGTAGCCCTGGCTACGCTGGAGGATTTTCCCGGCA  
GAATTCCAGTATTCCCTGCAGTTGGGCCAGGCAAACGATGACCGCTGAGCGTGCTGAAAAGCTGACTGCCCTTGGCGTC  
CATGCCGCATAATATTGATGCTGTTGTAGCAGGCATTATGAATCGCACTCACGTAGGATGTGATGCTGATCCGGTTAACCT  
TGTTGCTTGGCGGTTTGAAGGGGCGCTGGCCGACTAT

>CODH-OTU\_F4c2\_p1\_9

AGAAACCTGATCAGGGGCATCGCGGCGGGAGCGGCCGCTCATTCCGACCATGGACGGCATATTGCTCTTACTTTGTTAG  
AAGTGGCTGAGGGCCATGCCCCGGCGTACTGCATAAAAGATGAAAAAATAATGAGCGTCGCCGCCAGGCTGGGGC  
CTGTCCACCGAAGGC AAAAATGTCAGGCAGGTGGCCAAAGAGGTAGCCCTGGCTACGCTGGAGGATTTTCCCGGCA  
GAATTCCAGTATTCCCTGCAGTTGGGCCAGGCAAACGATGACCGCTGAGCGTGCTGAAAAGCTGACTGCCCTTGGCGTC  
CATGCCGCATAATATTGATGCTGTTGTAGCAGGCATTATGAATCGCACTCACGTAGGATGTGATGCTGATCCGGTTAACCT  
TGTTGCTTGGCGGTTTGAAGGGGCGCTGGCCGACTAT

>CODH-OTU\_F4c2\_p1\_76  
AGAAATCTGATCAGGGGCATCGCGGCAGGAGCGGCCGCTCATTCGACCATGGACGGCATATTGCTCTTACTTTGTTAG  
AAGTGGCTGAGGGCCATGCCCCGGCGTACTGTATAAAAGATGAGGAAAAATTAATGCACGTCGCCGCCAGGCTGGGCC  
TGTCCACCGAAGGCAAAAATGTCAGACAGGTGGCCAAAGAGGTAGCCCTGGCTACGCTGGAAGATTTTTCCCGGCAG  
GATTCCAGTATTCCCTGCAGTTGGGCCAGGCAAACGATGACCGCTGAGCGTGCTGAAAAGCTGACTGCCCTTGGCGTC  
ATGCCGCATAATATTGATGCTGTTGTAGCAGGCATTATGAATCGCACTCACGTAGGATGTGATGCTGATCCGGTTAACCT  
GTTGCTTGGCGGTTTAAAAGGGCGCTGGCCGACTAT

>CODH-OTU\_F4c2\_p1\_89  
AGAAATCTGATCAGGGGCATCGCGGCAGGAGCGGCCGCTCATTCGACCATGGACGGCATATTGCTCTTACTTTGTTAG  
AAGTGGCTGAGGGCCATGCCCCGGCGTACTGTATAAAAGATGAGGAAAAATTAATGCACGTCGCCGCCAGGCTGGGCC  
TGTCCACCGAAGGCAAAAATGTCAGGCAGGTGGCCAAAGAGGTAGCCCTGGCTACGCTGGAGGATTTTTCCCGGCAG  
AATTCCAGTATTCCCTGCAGTTGGGCCAGGCAAACGATGACCGCTGAGCGTGCTGAAAAGCTGACTGCCCTTGGCGTC  
ATGCCGCATAATATTGATGCTGTTGTAGCAGGCATTATGAATCGCACTCACGTAGGATGTGATGCTGATCCGGTTAACCT  
GTTGCTTGGCGGTTTAAAAGGGCGCTGGCCGACTAT

>CODH-OTU\_F4c2\_p1\_95  
AGAAATCTGATCAGGGGCATCGCGGCAGGAGCGGCCGCTCATTCGACCATGGACGGCATATTGCTCTTACTTTGTTAG  
AAGTAGCTGAGGGCCATGCCCCGGCGTACTGCATAAAAGATGAAAAAAATTAATGAGCGTCGCCGCCAGGCTGGGCC  
TGTCCACCGAAGGCAAAAATGTCAGACAGGTGGCCAAAGAGGTAGCCCTGGCTACGCTGGAAGATTTTTCCCGGCAG  
GATTCCAGTATTCCCTGCAGTTGGGCCAGGCAAACGATGACCGCTGAGCGTGCTGAAAAGCTGACTGCCCTTGGCGTC  
ATGCCGCATAATATTGATGCTGTTGTAGCAGGCATTATGAATCGCACTCACGTAGGATGTGATGCTGATCCGGTTAACCT  
GTTGCTTGGCGGTTTAAAAGGGCGCTGGCCGACTAT

>CODH-OTU\_F4c2\_p1\_103  
AGAAATCTGATCAGGGGCATCGCGGCAGGAGCGGCCGCTCATTCGACCATGGACGGCATATTGCTCTTACTTTGTTAG  
AAGTAGCTGAGGGCCATGCCCCGGCGTACTGCATAAAAGATGAAAAAAATTAATGAGCGTCGCCGCCAGGCTGGGCC  
TGTCCACCGAAGGCAAAAATGTCAGACAGGTGGCCAAAGAGGTAGCCCTGGCTACGCTGGAGGATTTTTCCCGGCAG  
AATTCCAGTATTCCCTGCAGTTGGGCCAGGCAAACGATGACCGCTGAGCGTGCTGAAAAGCTGACTGCCCTTGGCGTC  
ATGCCGCATAATATTGATGCTGTTGTAGCAGGCATTATGAATCGCACTCACGTAGGATGTGATGCTGATCCGGTTAACCT  
GTTGCTTGGCGGTTTAAAAGGGCGCTGGCCGACTAT

>CODH-OTU\_F4c2\_p1\_121  
AGAAATCTGATCAGGGGCATCGCGGCAGGAGCGGCCGCTCATTCGACCATGGACGGCATATTGCTCTTACTTTGTTAG  
AAGTAGCTGAGGGCCATGCCCCGGCGTACTGCATAAAAGATGAGGAAAAATTAATGCACGTCGCCGCCAGGCTGGGCC  
TGTCCACCGAAGGCAAAAATGTCAGACAGGTGGCCAAAGAGGTAGCCCTGGCTACGCTGGAAGATTTTTCCCGGCAG  
GATTCCAGTATTCCCTGCAGTTGGGCCAGGCAAACGATGACCGCTGAGCGTGCTGAAAAGCTGACTGCCCTTGGCGTC  
ATGCCGCATAATATTGATGCTGTTGTAGCAGGCATTATGAATCGCACTCACGTAGGATGTGATGCTGATCCGGTTAACCT  
GTTGCTTGGCGGTTTAAAAGGGCGCTGGCCGACTAT

>CODH-OTU\_F4c2\_p1\_122  
AGAAATCTGATCAGGGGCATCGCGGCAGGAGCGGCCGCTCATTCGACCATGGACGGCATATTGCTCTTACTTTGTTAG  
AAGTGGCTGAGGGCCATGCCCCGGCGTACTGTATAAAAGATGAGGAAAAATTAATGCACGTCGCCGCCAGGCTGGGCC  
TGTCCACCGAAGGCAAAAATGTCAGACAGGTGGCCAAAGAGGTAGCCCTGGCTACGCTGGAAGATTTTTCCCGGCAG  
GATTCCAGTATTCCCTGCAGTTGGGCCAGGCAAACGATGACCGCTGAGCGTGCTGAAAAGCTGACTGCCCTTGGCGTC  
ATGCCGCATAATATTGATGCTGTTGTAGCAGGCATTATGAATCGCACTCACGTAGGATGTGATGCTGATCCGGTTAACCT  
GTTGCTTGGCGGTTTAAAAGGGCGCTGGCCGACTAT

>CODH-OTU\_F4c2\_p1\_133  
AGAAATCTGATCAGGGGCATCGCGGCAGGAGCGGCCGCTCATTCGACCATGGACGGCATATTGCTCTTACTTTGTTAG  
AAGTAGCTGAGGGCCATGCCCCGGCGTACTGTATAAAAGATGAGGAAAAATTAATGCACGTCGCCGCCAGGCTGGGCC  
TGTCCACCGAAGGCAAAAATGTCAGACAGGTGGCCAAAGAGGTAGCCCTGGCTACGCTGGAAGATTTTTCCCGGCAG  
GATTCCAGTATTCCCTGCAGTTGGGCCAGGCAAACGATGACCGCTGAGCGTGCTGAAAAGCTGACTGCCCTTGGCGTC  
ATGCCGCATAATATTGATGCTGTTGTAGCAGGCATTATGAATCGCACTCACGTAGGATGTGATGCTGATCCGGTTAACCT  
GTTGCTTGGCGGTTTAAAAGGGCGCTGGCCGACTAT

>CODH-OTU\_F4a\_p1\_5  
CGGCAATGAGGTGATGATCGCGCACGGCATCCCGGCTGCACCCATTCCGGTGAGCCAAGAGATGGCTCTGATTACCGG  
GGCGGTAGATGCCATGGTGGTGGATTACCAAGTGCATGCTCCCTCCCTGGCTACGGTGGCAGAGTGCATGGGTACCCGG  
CTGATCACCAAGATGAGATACCAAGATCCCGGGGCTACCCACGTCAAATTTGCGGAGGAAACGGCCGAGAGAA  
CGCCCGGAGATCATCCGCTGGCCATCGAGGCCTTCTCCCGCGTCCGGGTCGGCCGGTAGACATCCCGCAGTACAG

AGCTAAAGTAGTGGCGGGCTTCTCGGTAGAGGCCATTGTGGCAGCCCTGGCCAAACTGAACGCTCAAGATCCTCTTCA  
GCCGTTGCTCGACCAAATCGTCTCCGGCAATATTAGGGGCGTCTGCCTCTTTGCCGGG

>CODH-OTU\_F4a\_p1\_7

CGGCAATGAGGTGATGATGCGGCACGGCATCCCGGCCTGCACCCATTTCGGTGAGCCAAGAGATGGCTCTGATTACCGG  
GGCGGTAGATGCCATGGTGGTGGATTACCAAGTGCATCATGCCCTCCCTGGCTACGGTGGCAGAGTGCATGGGTACCCGG  
CTGATCACCAACATGGAGATCACCAAGATCCCGGGGGCTACCCACGTCAAATTTGCGGAGGAAACGGCCGCAGAGAA  
CGCCCGGAGATCATCCGCCTGGCCATCGAGGCCTTCTCCCGCCGTCGGGGTCGGCCGGTAGACATCCCGCAGTACAG  
AGCTAAAGTAGTGGCGGGCTTCTCGGTAGAGGCCATTGTGGCAGCCCTGGCCAAACTGAACGCCCAAGATCCTCTTCA  
GCCGTTGCTCGACCAAATCGTCTCCGGCAATATTAGGGGCGTCTGCCTCTTTGCCGGG

>CODH-OTU\_F4a\_p1\_10

GGGCAACGAGGTGATGATGCGGCATGGCATTCCCGGCCTGCACCCATTTCGGTGAGCCAGGAGATGGCGCTGGTAACCGG  
TGCCTGGATGCCGTGGTAGTGGATTACCAAGTGCATCATGCCCTCCCTGGCTACGGTGGCCGAATGCATGGGCACTAAG  
CTCATCACTACCATGGAGATCACCAAGATCCCGGGGGCCATCCACATCGACTTTTCAGAGGAGACGGCCGGGGAGAAC  
GCCAGACAGATCATCCGCCTGGCCATCGAATCCTTCTCCCGTCGCCGGGGTAAGCCGGTGGACATACCGCCATATAAGA  
CCAAGGTGGTGGCGGGCTTCTCCGTGGAAGCCATTCTGAATGCCTGGCCAAGCTAAACGCCGAGGATCCTTTGAAAC  
CCCTGATCGACCAGATCGCTCCGGCAATATACGAGGAGTCTGCCTCTTCGCCGGG

**Data S2** Nucleotide sequences of the genetic regions between the abundant CODH-OTUs and their associated ECH genes which were amplified and determined from each CO-enriched sample. Predicted ORF regions encoding CODH and ECH genes are shown in red and blue font, respectively. Orange and light blue regions indicate CODH-related and ECH-related genes, respectively. Green region indicates ORF overlap. Underlines indicate the regions in which CODH-OTUs were found.

>Je1\_F4c1

GAAAGAGCCGAATACCTAAGGGTTATCGCTGATGAAGTAAAAAGAATAGCGTCCCATTGTTTAATATCGCTATGTTGGC  
TCATATCATTGGTTTTGATTTCGTTATTTATGCATGTCATGGAGGTACGGGAGATAGTCCAGGATACCAAAGAGACTATTTA  
TGGTAATCGGATGGATTTGGCTGCTAATTGTATTGGCGGCTAAAGTATGACCTTTCGATGAAAAGATTAAGTACCTGA  
TGAAGCAATTAGATAAGCTGAAAAAGCCGTTGGAAGAAATTATTGACATTATATGAACAACAAATTTGTGCGGGCTCG  
CACCGAAGGTTCGCGGATTTACCTAAAGAAGAAGCCCTCCGCTATGGTGTGGTTGGTCTGTAGCCAGAGGTTCCGG  
TATAGATTATGATGTGCGGGTCAAGAGTCCTATGCCGCTTATGACAAGATAAAGTTAATGTTCTGTAGAAAAGGGTT  
GTGATGTTAGAGCAAGAGCCATAGTTAGGCTCAGGGAAATTCAGGAAGCTATCAATATTATTCAGCAATGCTTAAAGA  
ATTGCCGACGCGCCAACCTGTATAGATTATTGCCGAAATACCTGCGGGGAAGCGGTAGCCAAGTCAGAGGCGCC  
GCGGGGAGAAGTGAATTTATCTACGCACAAACGGTCTGACAAGCCGGAACGGATCAAGTGGCGGGTACCAACTTA  
TATGAACTGGGAAGCGCTTCATGTTATGATACGGGAAATAAAGTAGCTGATATTCCTCTCATAATTAACAGCATTGATCC  
CTGTATTTCCCTGCACCGAAAAATAGGGAGATGATGCCATGTCATGAGTTGGCGATAGTGGATAGTCTTTTCCAGATTATCA  
ATACCAAAGTGAAAGAGCACCAAGTTAAAAAAGTCATAAAAGTGAAACTTAAGGTTGGCGAGATGACAGCGGTGGAA  
CCTATGACTTTAACTGCGTGTTTAAGGTTTATGCGCAAGTACTGTGGCCGAGGGTGCAGAGCTGGTTATTGAGCGGG  
TTCCTTTCAGGGAAAAATGTCGGGAATGTACCAATGTGTTCCGGGTTACAATTACAATTTCTCTGCCCGCAATGCAA  
GAGCAGAGCCATAGATATCGTTGCCGAGAGGAGCTGTACATTGAGGACCTAGAAGTAGAAAAATGACGATCCCTAGA  
AAGGAGGTGAACCGCAATGGCAAGAGCTAAAGAGAATTTCTTTATTACGCCGATCCCCAAAAATGTATGGGTTGCAA  
AAATTGTGAGATAGCCTGTGCTTTGGCTCATGCAGGCTGTGATTTACCAACTGCTGTAACCCAGGGTTTGCAATTACAG  
CCGAGAAATTCGGTGGTCCAAGTTGATGGCATGTTTATGCCGATTCAATGCCGACAATGTGAAGATGCGCCTTGTGCC  
ATGCCTGTCTACAGGAGCAATATCCAGGAAGGTAGGTTTGTAAAGATTAATGAGAGTAATTGTATTGGCTGTAAAGTT  
TGTGCTATGGTTTTGCTTTTGGAGCTATCATTATAGCAAAAGACGTGAGAGATAAAGATGGTTACAGAACTAAAAATG  
GTAAAGCAAGGAAATGTGATCTTTGTTTACAGCAGAAGACAGGATGGCCAGGAAGTATCTTGTGCCTGCGTTGAGGCAT  
GTCCTACTAAAGCTATAATGCTGGTAGATTACGAGAGTTATCGTAAGGGACTTATGGAAGAGAGAGGAAAAAGAACTTG  
AAGGGCGCATGTAAAAACTAAGGCCTAAGTTGAAATAAGGGGAGTGATTTTATGAATGAAAGGAAAAATCTTTAGAT  
CCTGCTGTTAATTTGCTGCCTTTAGCCAAAAAGCGGGAAATTGAAACTGTTGGGATCGTTTGCAGCAATGCAGC  
CCCAATGTGGTTTCGGAGAGCTGGGAATCTGTTGTCGCATTTGTTGGAAGGGACCTTGTGCTATCGATCCATTGGCAA  
TGGACCCAGAGAGGGGTTTGTGGGGCTGATGCTCATACCATTGTTGCGCGAAATTTGATTAGAATGATTGCTGCAGGT  
GCTGCTGCCATTCCGAGCACGGCCGACACATAGCTTTGACTTTATTAGAAGTTGGCGAAGGACATGCACCGGCGTACC  
GGATTAGAGACGAGCAAAAGTTAAGAAATATAGCGGAAAAATTAACCTGGCACCGGCAGGCAAAAATATAAGACAA  
GTGGCAAAAGAAGTGCTTTAGCTTCCCTGGAAGATTACTGCGGCAGAAGCAAAACGTACCCTGTACCTGGGCCAA  
AGAGACCTTGACCGCTGAGCGGGTGGACAAACTGGCAGAACTGGGGGTTATGCCCCACAATATCGATGCAGTTATCAC  
CGAGATTATGGGTCGAACTCATGTGGGTTGTGATGCCGATGCAGTCAACGTTTTGCTCGGCGGCTTAAAGGGAGCACT  
GGCAGATTATACGGGATGTGTTTGTCAACTGAGTTGTTTGTGCTTATTTGGTACCCCTGAACCGGTAGTTACCACTG  
CCAACCTCGCGTTTTGAAGGAAAAATGCTGTCAACATCGCGGTTTATGGCCACAACCCTGTGCTTAGTGAGATTATTG  
TGATGTAGCGCTGAAGATGAAAAGAAGAGCTGAGAAAGCCGGGGCTAAAGAAGGTATTAACATAGTGGGTATTGCTG  
TACTGGTAATGAGGTGATGATGCGACGGGAATTCCTGCTGCTACCAACTACCTGTCCCAAGAACTGGCCATAATTACA  
GGCGCTGTAGATGCTATGGTCGTAGACGTGCAGTGTATTATGCCTGCTATTACCAGCTTAGCAGAGTGTTCATACAGA  
ATAATTACCCTATGCCGTAACAAAAATTCCTGGCGCAACGCACGTAGAGTTTTGTGAGGATTCAGCGATAGAAAGT  
CGCGAGAAAATGTTGAATTGGCAATTGAGGCCTTAAAAAACGGGACAAGCAAAAAGTTAAC

>Je1\_F4c2

GGGCCGAATATCTCCGGGTGATCGCTGATGAGATCAAACGCATCGCCTCACATTTGTTAATACAGGAATGTAGCCCAT  
ATTATCGGTTTTGATTCATTGTTTCATGCACGTAATGGAGTTAAGAGAAATAGTCCAGGATACAAAAGAAACAATTTATGG  
AAACCGGATGGACCTGGCGGCCAACAGTATTGGCGGGTAAGGTACAACTTACTGAAGAAAAAGGGAAATACCTCC  
TGAAAAATTTAGAGCAGCTCAAAAAACCGCTGCAGGAGATTGCAAAATTTACAGTACCAATCCCTGGTCAGACTCA  
GAACAGAAGGGGTAGGCATATTACCCAAAAGAAAAAGCCGTCGAGTATGGAGTAGTCGGGCTGTGCCAGGGGTTC  
GGAATCAATTATGATGTACGGGTGAAAAACCTTACGCAGCATATAACCGGTTGAAGTTTACTGTTCTGTGAAACCG  
CCGGGGATGTCAGGGCAAGGGCTATTGTAAGTTAAGAGAAATTGCGGAGTCAATAAGCATCATTGAACAGTGTGTC  
GTGATATGCCCCAGGGACCAACCTGCCTGGATTATTGCTGATATACCTGCTGGGGAGGCAGTTGCCAAGTCGGAGGC  
GCCGCGGGGGAACTGCTGTATTATGTGCGTACGGCCAACAGTGATCTGCCTGAACGCATCAATGGCGCGTACCAAC  
TTATATGAACCTGGGAAGCTTTGAAAATCATGATTCCAGGGAACAAACTGGCCGATGTTCCGGTTATTATCGGCAGCATTG  
ACCCTTGATTTCTGCACCGAGAGATAGCCAACCTTAATGCATTAGCTCCGAAGGTTTTACTATACGGGAGGAAGGG  
ATGCCCATGCATGAGGCGCAATAGTAGAGAGTATTTTCAGTGTCTCAATGCCAAATAAAGGAGCACCGGATAAAAA  
AAGTATTGAAAGTAAACTCAGGGTTGGGGAAATGACTGCCATAGAGAATACCACTTTGATAGCCTGTTTCGAAGTTTA  
TGCTGAAAATACCGCGGTCCAGGGAGCAGACCTGTCATCGAGCGGGTTCCGCTCAAGGCAAGGTGTCAGGAGTGCA  
AGGAGGAGTTTCTGTGCTCAATTATAGTTTTGCTGTTCCGCTGTGGGGCATAAATGTACAGGTTATTTAGGCGAG  
GGAAGTGTACATTGAAAGCATTGAAGCAGAAAAGTTGAAGAGGAGGTGAATCCAGTGGCCAAAATTAAGGAGAAC  
TCGTTTTATTATGCAGACCCGCAGAAATGCCTGGGCTGCAAAAATTGTAAGTGGCCTGTGCGCTGGCTCACGCGGGTT  
GTGACCTGCAACCGGCTGTAGCGGGAAAACGGCAGTTACAGCCGCGCAACTCAGTGGTCAAGGCAGGCGACATGTTT  
ATGCCGATTCAGTGCCGGCAGTGTGAAGACGCGCCATGCGCCCAGGCTGTCCAACGGGAGCTATCAGGCAGGAGGAT  
GGATTAGTCAAAATCAACGAACAAAACTGTGTTGGTTGCAAAGTGTGCTCTATGGTTTGCCTTTTGGAGCCATTGTTG  
TGACTCCGTTCTAATGCTGAACCAACCGAAGACTAAAAGGGCAAGGCCTTAAATGTGACCTATGCTTCAGCA  
GCGTCCGAAAAGATGGCCAACCTAACCTGCGCCTGTGTGGAAGCCTGTCTCACGCAGGCTGTAATGCTGGTTGATCCT  
GAGGGTTACCGGACAAAGATTCTGAAGCCAGAGCCAAGAATTGGCCAAGGCTCATTAGTAGCTAAGCAGAAGCG  
GGCATAAAATTGGGGGGAGAAGCGTGAATAAGGATTATAAATTTGTTGACCAGGCAATTGAAGAGCTGCTGCCGAAAG  
TCAAGGAGGCAGGATTGGACACGGTTTGGGTCAGGTTCAAAAAGCATGCAGCCACAATGCGGATTTGGTGAGCTGGGA  
ATTTGCTGCCGATCTGTTGAAAGGGCCGTGCCGATTGACCCCTTTGGTAAACGGGCTCAGCGCGGCATTTGCGGGG  
CAGATGCTCACACCATTTGGCGAGAAATCTGATCAGGGGCATCGCGGCAGGAGCGGCCCTCATTCCGACCATGGAC  
GGCATATTGCTCTTACTTTGTTAGAAGTAGCTGAGGGCCATGCCCCGGGCTACTGCATAAAAGATGAAAAAAAATTAAT  
GAGCGTCGCCGCCAGGCTGGGCTGTCCACCGAAGGCAAAATGTCAGGCAGGTGGCCAAAGAGGTAGCCCTGGCTA  
CGCTGGAGGATTTTTCCCGGCAGAATTCCAGTATTCCTTGAGTTGGGCCAGGCAAACCATGACCGCTGAGCGTGCTG  
AAAAACTGACTGCCCTTGGCGTCATGCCGATAAATATTGATGCTGTTGTAGCAGGCATTATGAATCGCACTCACGTAGG  
ATGTGATGCTGATCCGGTTAACCTGTTGC

>Je2\_F4c1

AAAGAGCCGAATACCTAAGGGTTATCGCTGATGAAATAAAAAAGAATAGCGTCACATTTGTTAATATCGCTATGTTGGCT  
CATATCATTGGTTTTGATTTCGTTATTCATGCATGTCATGGAGGTACGGGAGATAGTCCAGGATACCAAAGAGACTATTTAT  
GGTAATCGGATGGATTGGCTGCTAATTGTATTGGCGGCGTAAAGTATGACCTTTCCGATGAAAAGATTAAGTACCTGAT  
GAAGCAATTGATAAACTGAAAAAGCCATTGGAAGAAATTATTGACATTTATATGAACAACAAATTTGTGCGGGCTCGC  
ACCGAAGGTGTGCGGATTTTACCTAAAGAAGAAGCCCTCCGCTATGGTGTGGTTGGTCCGTAGCCAGAGGGTCCGGT  
ATAGATTATGATGTGCGGGTCAAGAGCCCTTATGCCGCTTATGACAAGATAAAGTTAATGTTCCGTAGAAAAAGGTTG  
TGATGTTAGAGCGAGGGCCATAGTTAGGCTCAGGGAAATTCAGGAAGCTATCAATATTATTCAGCAATGCTTAAAGAA  
TTGCCGACGGCCCAACTTGATAGATTATTTGCCGAAAATACCTGCGGGGAAGCAGTAGCCAAGTCAGAGGCGCCG  
CGGGGAGAACTGATTTATCTACGCACAAACGGTTCTGACAAGCCGGAACGGATCAAGTGGCGGGTACCAACTTAT  
ATGAATTGGAAGCGCTTATGTTATGATACCGGAAAATAAAGTAGCTGATATTCCTCTCATAATTAACAGCATTGATCC  
TGATTTCTGCACCGAAAAATAGGGAGATGATGCCATGCATGAGTTGGCGATAGTGGATAGTCTTTTCCAGATTATCAA  
TACCAAAGTGAAGAACACCAAGTTAAAAAAGTTATAAAGTGAAGTAAAGGTTGGCGAGATGACAGCGGTGGAAC  
CTATGACTTTAACTGCGTGTTTTAAAGTTTATACGCAAGGTAAGTGTGGCCGAGGGTGCAGAGCTGGTTATTGAGCGGT  
TCCTTTGCAGGGAAAATGCCGGGAATGTACCCTGTGTTTCGGGTTCAATTACAATTTTCTGCCCCGAATGTAAG  
AGCAGAGCCATAGATATCGTTGCCGAGAGGAGCTGTACATTGAGGACTTAGAAGTAGAAAAATGAGGATTCCCTAGAA  
AGGAGGTGAACCGCAATGGCAAGAGCTAAAGAAAATTTCTTTATTTACGCCGATCCTCAAAAATGTATGGGATGCAAA  
AATTGTGAGATAGCCTGTGCTTTGGCTCATGCAGGCTGTGATTACAAACTGCTGTAACCCAGGGTTTGCATTACAGC  
CAAGAAATTCGGTGGTCCAAGTAGATGGCATGGTTATGCCGATCAATGCAGGCAATGGAAGATGCGCCTTGTGCCCA  
TGCTGTCTACAGGAGCAATATCCAGGAAGGTAGGTTTGTAAAGATTAATGAGAGTAATTGTATTGGCTGTAAAGTTT  
GTGCTATGGTTTGTCTTTTGGAGCTGTCTATTATAGCAACAGACATGAAAGATAAAGATGGTTACAGAACTAAAAATGG  
TAAAGCAAGGAAATGTGATCTTTGTTTACGAGAAGACAGGATGGCCAGGAAGTATCCTGTGCCTGCGTTGAGGCATG  
TCCTACTAAAGCTATAATGCTGGTAGATTACGAGAGTTATCGTAAGAACTTATGGAAGAGAGAGGAAAAGAACTTGTA  
AGGGCGCATGTAAAAACTAAGGCCTAAGTTGAAATAAAGGGGAGTGATTTTATGAATGAAAGGAAAAATCTTTAGAT  
CCTGCTGTTAATTATTTGTGCTTTAGCCAAAAAGGCGGGAATTGAGACTGTTGGGATCGTTTGCAGCAATGCAGC  
CCCAATGTGGTTTCGGAGAGCTGGGAATCTGTTGCCGATTTGTTGGAAGGGACCTTGTGCTATCGATCCTTTTGGCAA  
TGGACCCCAGAGAGGGGTTTGTGGGGCTGATGCTCATACCATTGTTGCGCGAAATTTGATTAGAATGATTGCTGCAGGT  
GCTGCTGCCATTCCGAGCACGGCCGACACATAGCTTTGACTTTACTAGAAGTTGGCGAAGGACATGCACCGGCGTAC  
CGGATTAAGACGAGCAAAAAGTTAAGAAATATAGCGGAAAAATTAACCTTGGCACCGGCAGGCAAAAGATGTAAGACA  
AGTGGCAAAAAGAAGTGGCTTTAGCTTCCCTGGAAGATTACTACGGCAGAAGCAAAACGTACCTTGTACCTGGGCCAA  
AGAGACCTTGACCGCTGAACGGGTGGACAACTGGCAGAACTAGGGGTTATGCCCCACAATATCGATGCAGTTATCAC  
CGAGATTATGGGCCAACTCATGTGGTTGTGATGCCGATGCAGTCAACGTTTTGCTCGGCGGCTTAAAGGGAGCACT  
GGCAGATTATACCGGTATGTGTTGTCAACTGAGCTGTCTGATGCCTTATTTGGTACCCCTGAACCGGTAGTTACCCTG  
CCAACCTCGCGTTTTGAAAGGAAGATGCTGTCAACATCGCGTTTATGGTCAACACCCTGTGCTTAGTGAGATTATTTG  
TGATGTAGCGCTGAAGATGAAAAGAAGCTGAGAAAAGCCGGGGCTAAAGAAGGTATTAACATAGTGGGTATTTGCTG  
TACTGGTAATGAGGTAATGATGCGACGGGAATTCCTGCTACCAACTACCTGTCCCAGGAAGTGGCCATAATTACA  
GGCGCTGTAGATGCTATGGTCTGACGCTGACGTGATTTATGCCTGCTATTACCAGCTTAGCAGAGTGTTCATACAGA  
AATAATTACCACTATGCCGTAACAAAATTCCTGGCGCAACGCATGTAGAGTTTCGTGAGGATTCAGCGATAGAAAGT  
GCGGAGAAAATGTTGAACTGGCAATTGAGGCTTTTAAAAGACGGGACAAGCAAAAAGT
